# Supplementary material for: Visible light assisted photocatalytic hydrogen generation by Ta2O5/Bi2O3, TaON/Bi2O3, and Ta3N5/Bi2O3 composites
Source: Royal Society of Chemistry journal article supplement (doi:10.1039/c5ra06563a), 2015-01-01
Supplement: c5ra06563a1.pdf [file c5ra06563a1.pdf]

Supporting Information

Visible Light Assisted Photocatalytic Hydrogen Generation by  $\text{Ta}_2\text{O}_5/\text{Bi}_2\text{O}_3$ ,  $\text{TaON}/\text{Bi}_2\text{O}_3$ , and  $\text{Ta}_3\text{N}_5/\text{Bi}_2\text{O}_3$  Composites

Shiba P. Adhikari,<sup>a, b</sup> Zachary D. Hood,<sup>c</sup> Karren L. More,<sup>c</sup> Ilia Ivanov,<sup>c</sup> Lifeng Zhang,<sup>d</sup> Michael Gross,<sup>a, b</sup> and Abdou Lachgar<sup>\*a, b</sup>

1.1 Synthesis of tantalum oxide nanoparticles

In a typical synthesis of tantalum oxide nanoparticles, 1 g of tantalum chloride was dissolved in 60 mL of anhydrous benzyl alcohol. The whole mass was sealed in a Teflon lined autoclave and heated at 220 °C for 48 hours. The solid mass was obtained by centrifugation, washed with ethyl alcohol several times and vacuum dried at 70 °C overnight. Based upon the thermogravimetric analysis, the sample was calcined at 700 °C for 2 hours to obtain the pure phase of tantalum oxide (TA-700).<sup>1</sup>

1.2 Synthesis of tantalum oxynitride and tantalum nitride

In a typical synthesis of tantalum oxynitride (TaON), 500 mg of  $\text{Ta}_2\text{O}_5$  powder were heated at 825 °C for 6 hours in a tube furnace under a constant flow of ammonia (20 mL/ min) where ammonia gas was passed through a round bottom flask containing deionized water. Similarly tantalum nitride ( $\text{Ta}_3\text{N}_5$ ) was synthesized from  $\text{Ta}_2\text{O}_5$  powder under the same conditions but using dry ammonia (without passing the ammonia through deionized water).<sup>2</sup>

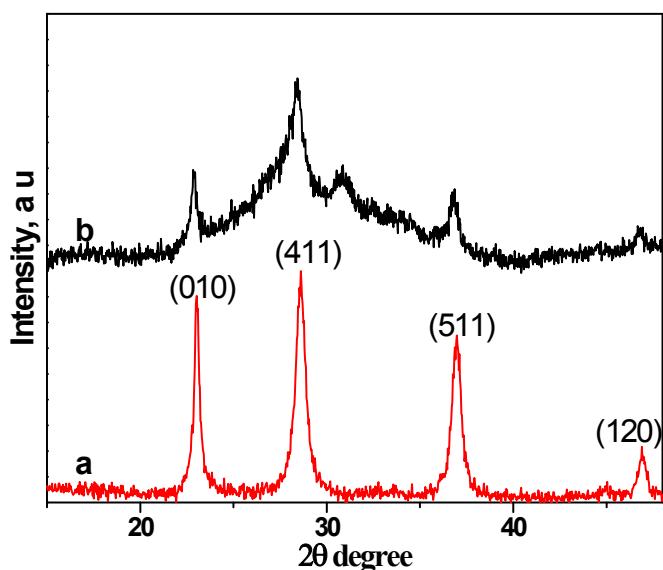

Fig. 1S- XRD patterns of tantalum oxide nanoparticle (a) and as synthesized BITA composite before heating at 400 °C (b)

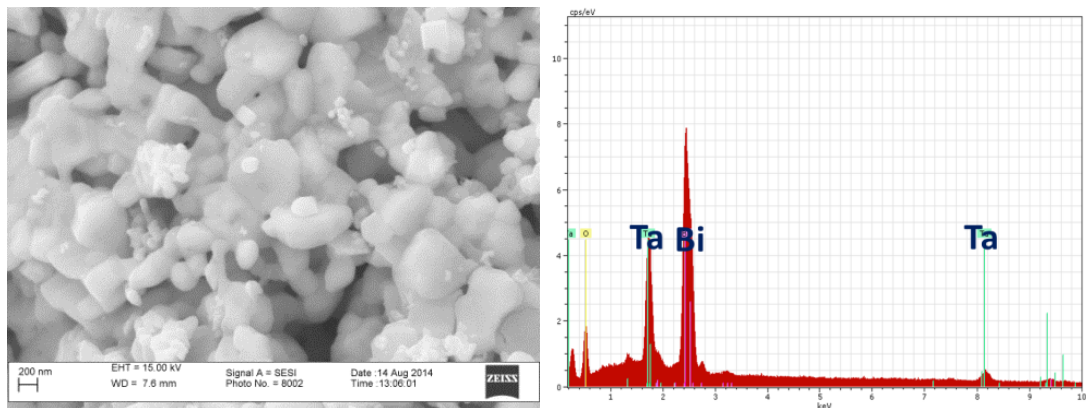

**Fig. 2SI-SEM images and EDS spectrum of bismuth tantalate (BITA-1000).**

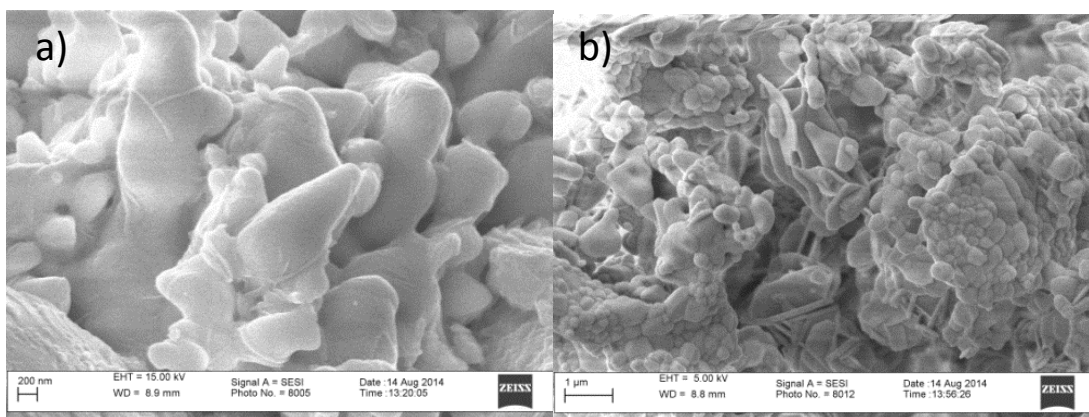

**Fig. 2SII- SEM images of Tantalum oxynitride (a) and tantalum nitride (b).**

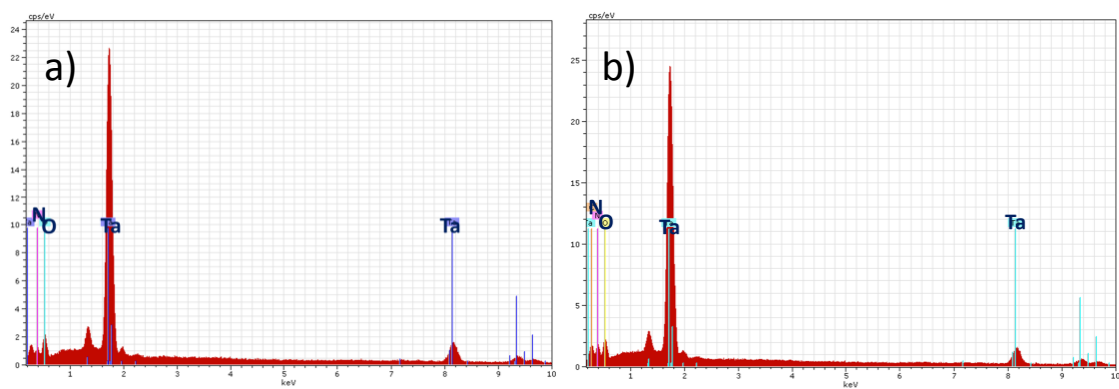

**Fig. 2SIII- EDS spectrum of Tantalum oxynitride (a) and tantalum nitride (b).**

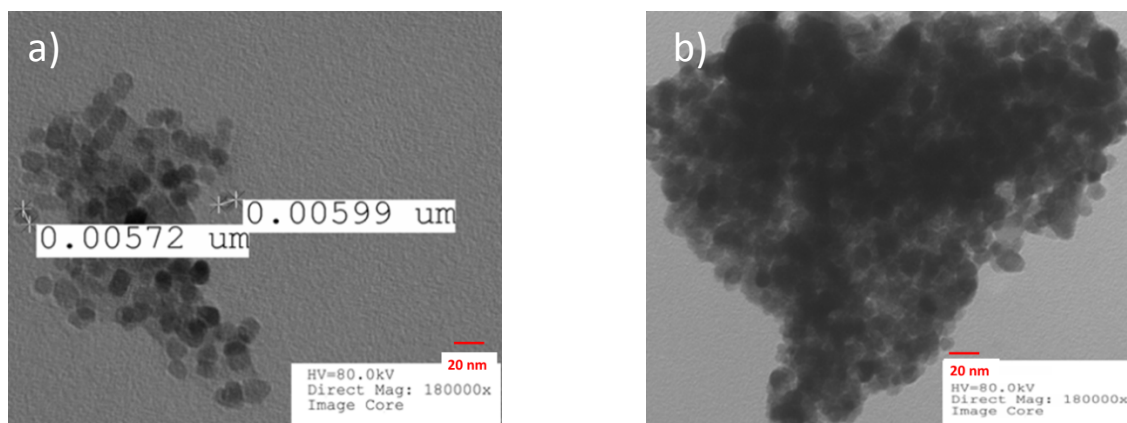

**Fig. 3S-** TEM images of tantalum oxide nanoparticle. (a) as synthesized and (b) calcined at 700 °C.

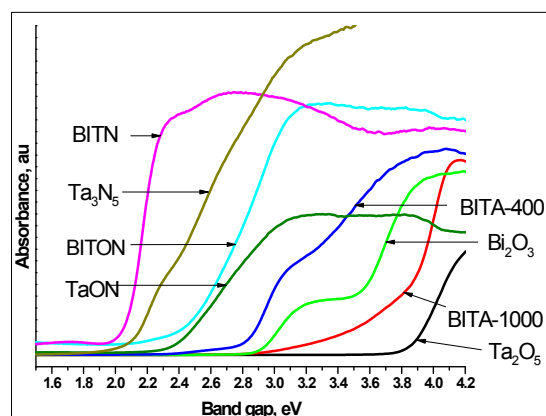

**Fig. 4S-** UV/Vis diffuse reflectance spectra of synthesized products.

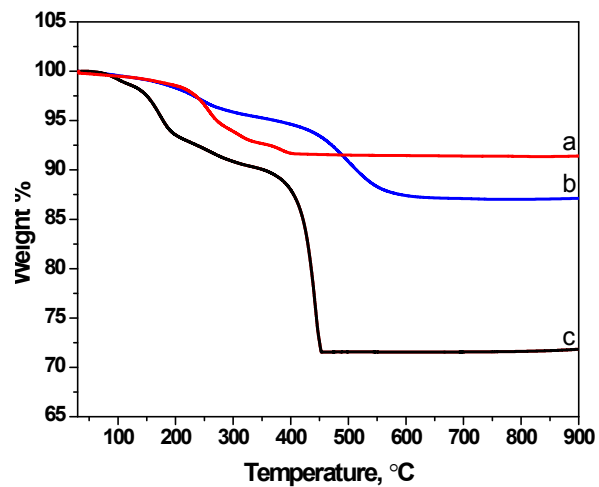

**Fig. 5S-** Thermogravimetric analysis of a) BITA composite b) tantalum oxide c) bismuth oxide

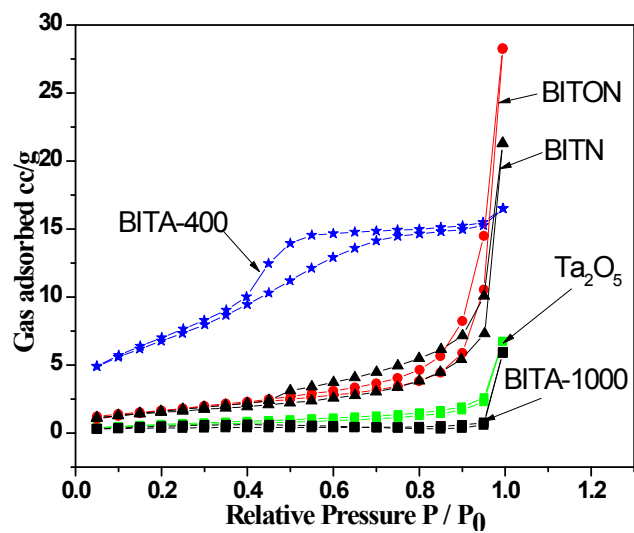

**Fig. 6S-** N<sub>2</sub> adsorption desorption isotherms of BITA-400, BITON, BITN and BITA-1000

#### References

1. J. Buha, D. Arcon, M. Niederberger and I. Djerdj, *Phys. Chem. Chem. Phys.*, 2010, **12**, 15537-15543
2. M. Y. Tsang, **Macroporous semiconductors tantalum oxide, (oxy)nitride and nitride for photocatalytic hydrogen evolution**. M.Sc. thesis; University of York, 2010.
